# Supplementary material
Source: HighWire-hosted journal article supplement (https://erj.ersjournals.com/content/58/6/2101890)
Supplement: inline-supplementary-material-1 [file inline-supplementary-material-1.pdf]

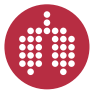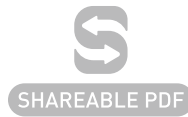

# Epigenetic blood biomarkers of ageing and mortality in COPD

Ana I. Hernandez Cordero <sup>1</sup>, Chen Xi Yang <sup>1</sup>, Stephen Milne <sup>1,2,3</sup>, Xuan Li<sup>1</sup>, Zsuzsanna Hollander<sup>1,4</sup>, Virginia Chen<sup>4</sup>, Raymond Ng<sup>4</sup>, Scott J. Tebbutt<sup>1,2,4</sup>, Janice M. Leung<sup>1,2</sup> and Don D. Sin<sup>1,2</sup>

<sup>1</sup>Centre for Heart Lung Innovation, St. Paul's Hospital and University of British Columbia, Vancouver, BC, Canada. <sup>2</sup>Division of Respiratory Medicine, Dept of Medicine, University of British Columbia, Vancouver, BC, Canada. <sup>3</sup>Sydney Medical School, Faculty of Medicine and Health Sciences, University of Sydney, Sydney, Australia. <sup>4</sup>PROOF Centre of Excellence, St. Paul's Hospital, Vancouver, BC, Canada.

Corresponding author: Ana I. Hernandez Cordero ([ana.hernandez@hli.ubc.ca](mailto:ana.hernandez@hli.ubc.ca))

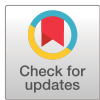

Shareable abstract (@ERSpublications)

**Epigenetic blood biomarkers of cellular and replicative senescence may improve the clinical assessment of COPD patients, particularly for those at a higher risk of death** <https://bit.ly/3nEM7tp>

**Cite this article as:** Hernandez Cordero AI, Yang CX, Milne S, *et al.* Epigenetic blood biomarkers of ageing and mortality in COPD. *Eur Respir J* 2021; 58: 2101890 [DOI: 10.1183/13993003.01890-2021].

This single-page version can be shared freely online.

Copyright ©The authors 2021.  
For reproduction rights and  
permissions contact  
[permissions@ersnet.org](mailto:permissions@ersnet.org)

Received: 05 July 2021  
Accepted: 09 Sept 2021

## To the Editor:

COPD is an age-related condition that is linked to cellular senescence [1]. In COPD, contributors to cellular senescence include oxidative stress from environmental factors, such as cigarette smoking and persistent lung inflammation [2]. These factors can also augment replicative senescence, which is characterised by progressive telomere attrition, ultimately leading to cell cycle arrest and death. Patients with COPD have shorter telomeres [3] and faster rates of telomere attrition [4] compared to controls; however, the clinical impact of cellular or replicative senescence in COPD remains uncertain.
